# Supplementary material for: Electrically Conductive Polyetheretherketone Nanocomposite Filaments: From Production to Fused Deposition Modeling
Source: PubMed Central journal article supplement (PMC6403709; doi:10.3390/polym10080925), 2018-08-18
Supplement: polymers-10-00925-s001.pdf [file polymers-10-00925-s001.pdf]

# Supplementary

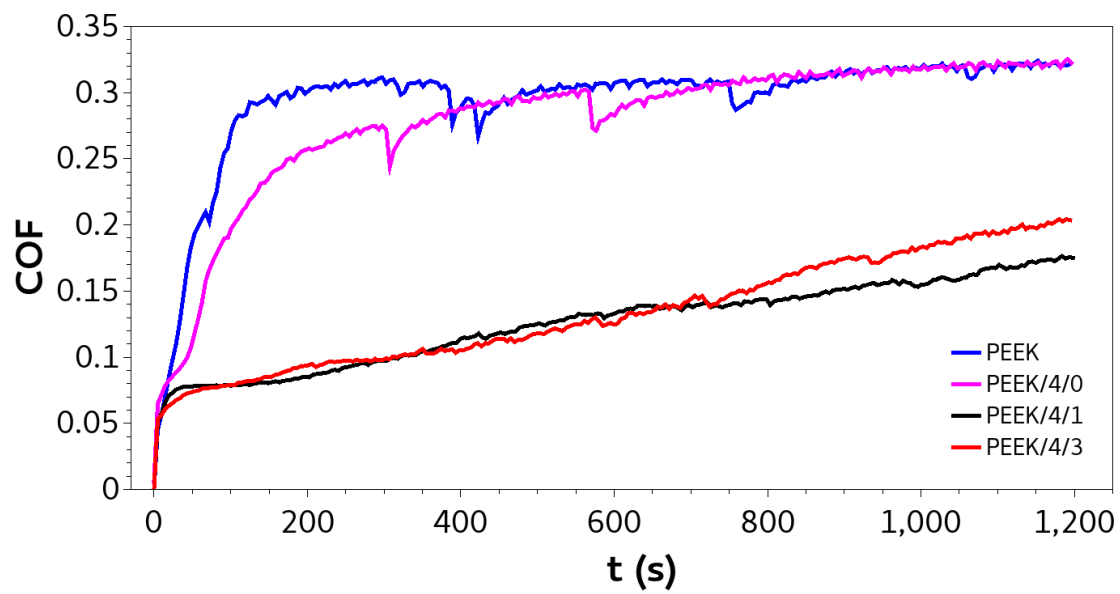

Figure S1

## Conductive 3D Printing PEEK Filament

| Physical Properties                 | Value           | Unit              | Standard             |
|-------------------------------------|-----------------|-------------------|----------------------|
| Specific gravity                    | 1,31            | g/cm <sup>3</sup> | ISO 1183             |
| Melt flow rate (360 °C / 10 kg)     | 2               | g/10 min          | ASTM D1238           |
| Mechanical Properties               | Value           | Unit              | Standard             |
| Tensile Modulus                     | 1,60 ± 0,07     | GPa               | ASTM D2256           |
| Tensile Strength                    | 92 ± 1          | MPa               |                      |
| Tensile Elongation at Break         | 53 ± 8          | %                 |                      |
| Thermal Properties                  | Value           | Unit              | Standard             |
| Melting Temperature                 | 343             | °C                | ISO 11357            |
| Electrical Properties               | Value           | Unit              | Standard             |
| Volume Conductivity (23 °C)         | 7               | S/m               | Internal test method |
| Loss Tangent (23 °C / 1 MHz)        | 2,5             | n/a               |                      |
| Dielectric Constant (23 °C / 1 kHz) | 10 <sup>6</sup> | n/a               |                      |
|                                     | Value           | Unit              |                      |
| Diameter                            | 1,75            | mm                |                      |
